# Supplementary material for: Microwave-assisted deposition of a highly active cobalt catalyst on mesoporous silica for photochemical CO2 reduction
Source: Royal Society of Chemistry journal article supplement (doi:10.1039/c7dt01207a), 2017-01-01
Supplement: c7dt01207a1.pdf [file c7dt01207a1.pdf]

**Electronic Supplementary Information**

**Microwave-assisted Deposition of a Highly Active Cobalt Catalyst on  
Mesoporous Silica for Photochemical CO<sub>2</sub> Reduction**

Thomas Fenton, Samantha Gillingham, Tong Jin, and Gonghu Li \*

*Department of Chemistry, University of New Hampshire, Durham, NH 03824, United States*

\* To whom correspondence should be addressed. Email: [gonghu.li@unh.edu](mailto:gonghu.li@unh.edu).

**List of Supplementary Figures**

**Figure S1.** Pore size distribution of bare SBA-15 and Co<sup>III</sup>(cyclam)X/SBA;

**Figure S2.** Transmission infrared spectrum of [Co(cyclam)Cl<sub>2</sub>]Cl mixed with KBr;

**Figure S3.** UV-visible spectrum of [Co(cyclam)Cl<sub>2</sub>]Cl dissolved in H<sub>2</sub>O;

**Figure S4.** UV-visible spectrum of [Co(cyclam)Cl<sub>2</sub>]Cl deposited on a non-porous SiO<sub>2</sub>;

**Figure S5.** Selectivity in photochemical CO<sub>2</sub> reduction using Co<sup>III</sup>(cyclam)X/SBA;

**Figure S6.** Infrared spectra of Co<sup>III</sup>(cyclam)X/SBA before and after thermal treatment at 473 K.

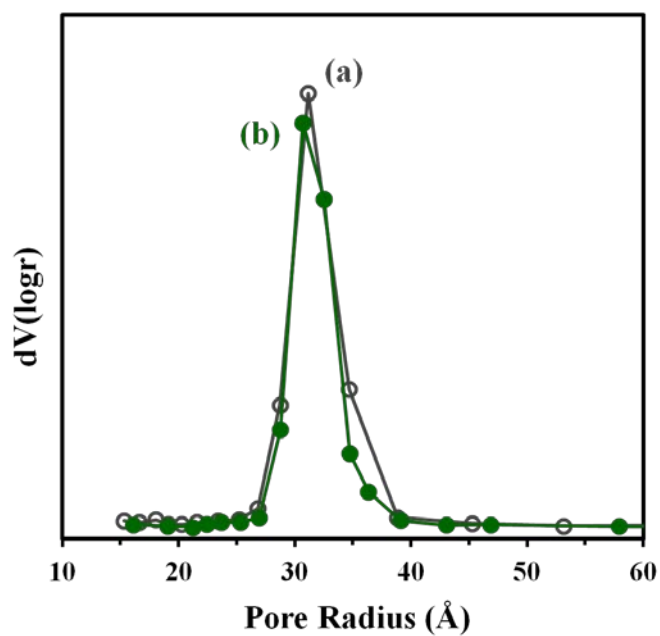

**Figure S1.** Pore size distribution of (a) bare SBA-15 and (b)  $\text{Co}^{\text{III}}(\text{cyclam})\text{X}/\text{SBA}$ .

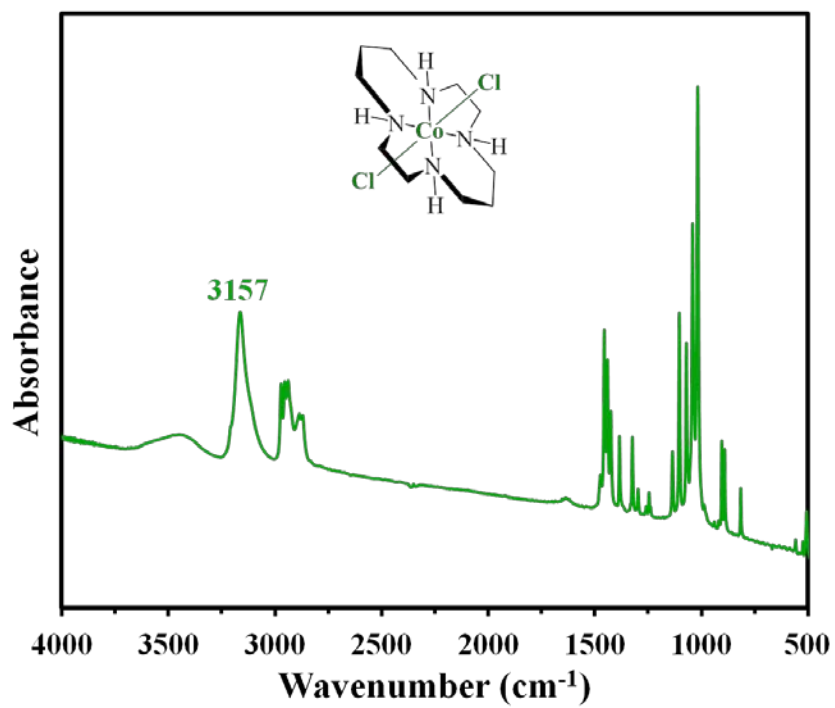

**Figure S2.** Transmission infrared spectrum of  $[\text{Co}(\text{cyclam})\text{Cl}_2]\text{Cl}$  mixed with KBr.

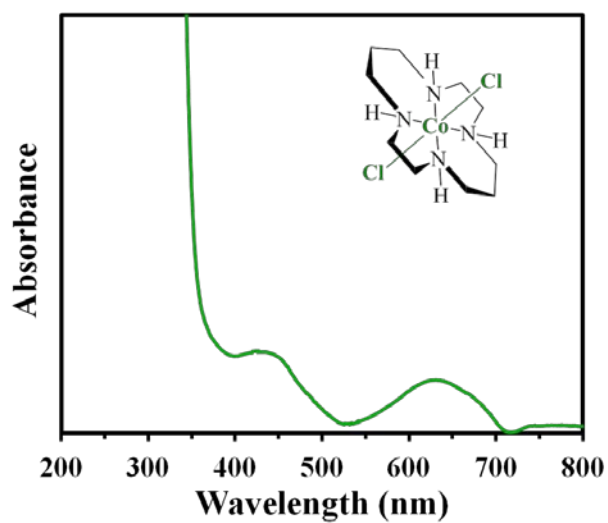

**Figure S3.** UV-visible spectrum of [Co(cyclam)Cl<sub>2</sub>]Cl dissolved in H<sub>2</sub>O.

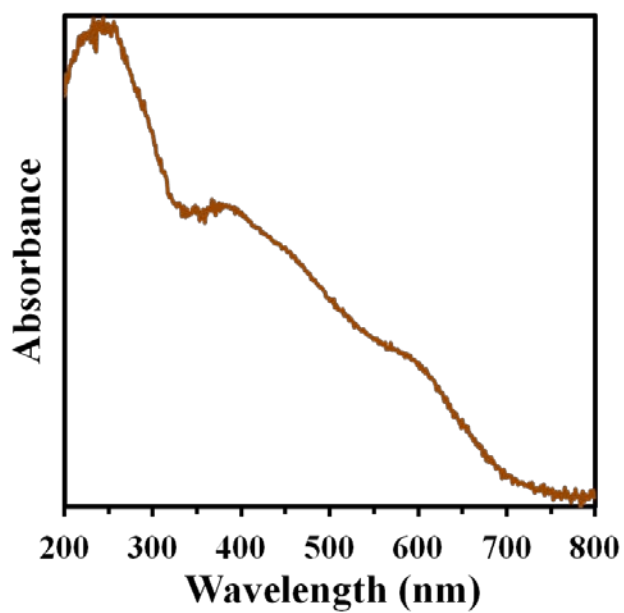

**Figure S4.** UV-visible spectrum of [Co(cyclam)Cl<sub>2</sub>]Cl deposited on a non-porous SiO<sub>2</sub> via the microwave method.

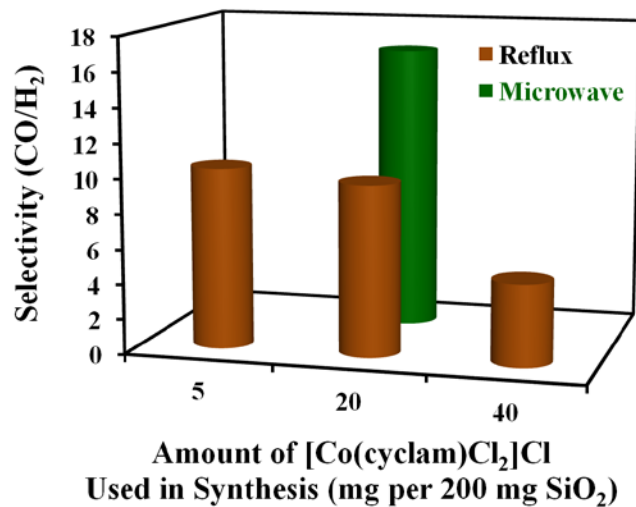

**Figure S5.** Selectivity in photochemical CO<sub>2</sub> reduction using Co<sup>III</sup>(cyclam)X/SBA prepared by the microwave method (green) and the reflux method (brown). Concentration of *p*-terphenyl was 2.0 mM.

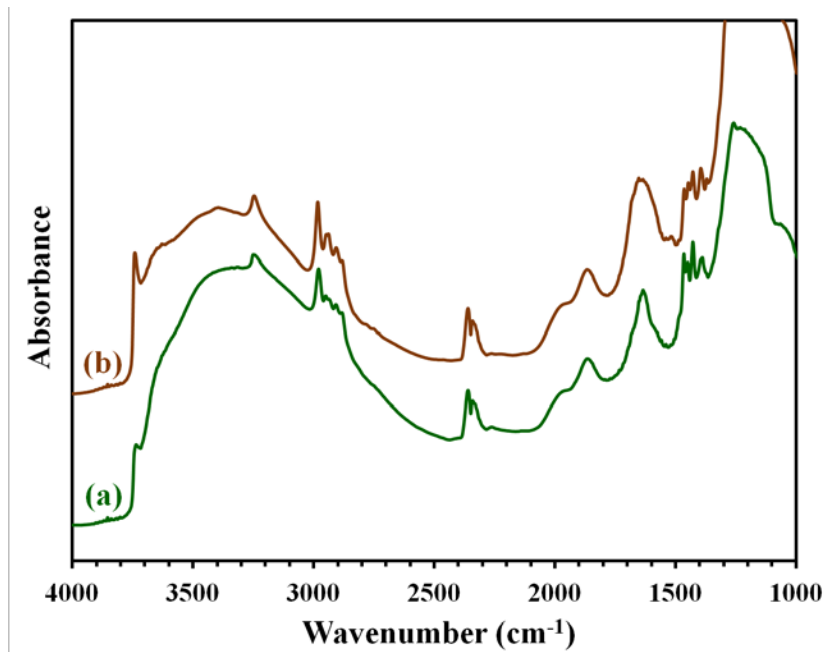

**Figure S6.** Infrared spectra of Co<sup>III</sup>(cyclam)X/SBA before (a) and after (b) thermal treatment at 473 K under vacuum.
